# Supplementary material for: Antibacterial plasticizers based on bio-based engineering elastomers for medical PVC: synthesis, characterization and properties
Source: Royal Society of Chemistry journal article supplement (doi:10.1039/d0py01702g), 2021-01-01
Supplement: d0py01702g2.pdf [file d0py01702g2.pdf]

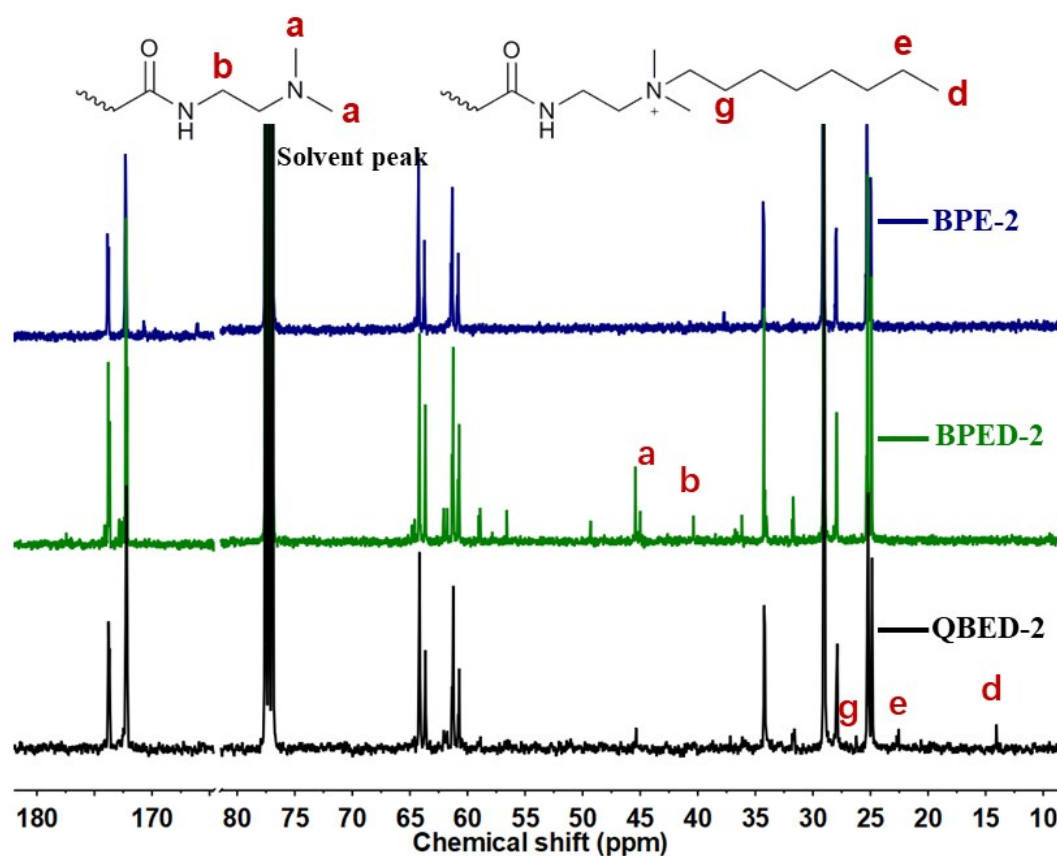

**Figure S1.** Quantitative  $^{13}\text{C}$  NMR spectra of BPE-2, BPED-2 and QBED-2.

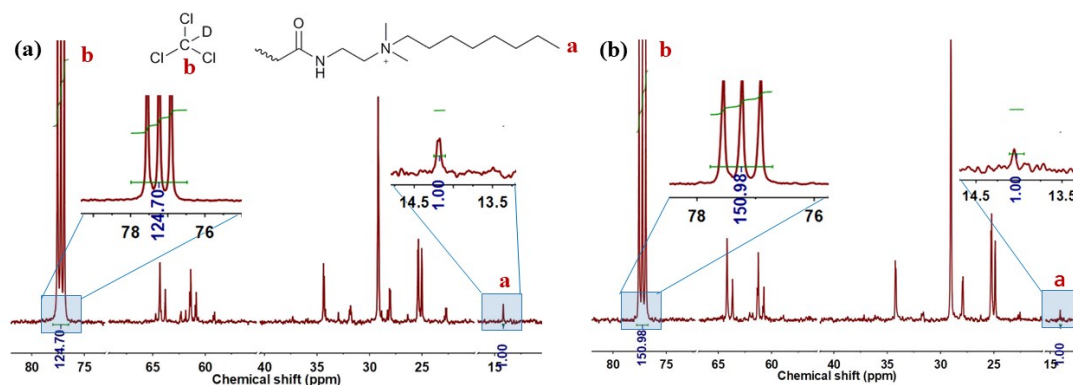

**Figure S2.** (a) Analysis of quantitative  $^{13}\text{C}$  NMR spectrum of QBED-1, (b) analysis of quantitative  $^{13}\text{C}$  NMR spectrum of QBED-2.

$$\text{wt. \%} = \left( \frac{m_{\text{CDCl}_3}/M_{\text{CDCl}_3})/(A_b/A_a) \times M_{\text{QBED}}}{m_{\text{QBED}}} \right) \times 100\%$$

$m_1 \text{CDCl}_3 = 0.8674 \text{ g}$   
 $m_{\text{QBED} - 1} = 0.1092 \text{ g}$   
 $m_2 \text{CDCl}_3 = 0.8792 \text{ g}$   
 $m_{\text{QBED} - 2} = 0.1083 \text{ g}$   
 $M_{\text{CDCl}_3} = 120.38 \text{ g/mol}$   
 $M_{\text{QBED}} = 281.28 \text{ g/mol g}$   
 $A_{b1}/A_{a1} = 124.7$   
 $A_{b2}/A_{a2} = 150.98$

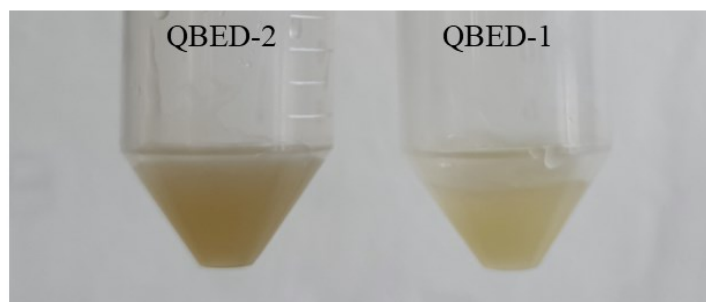

**Figure S3.** Images of QBED-1 and QBED-2.

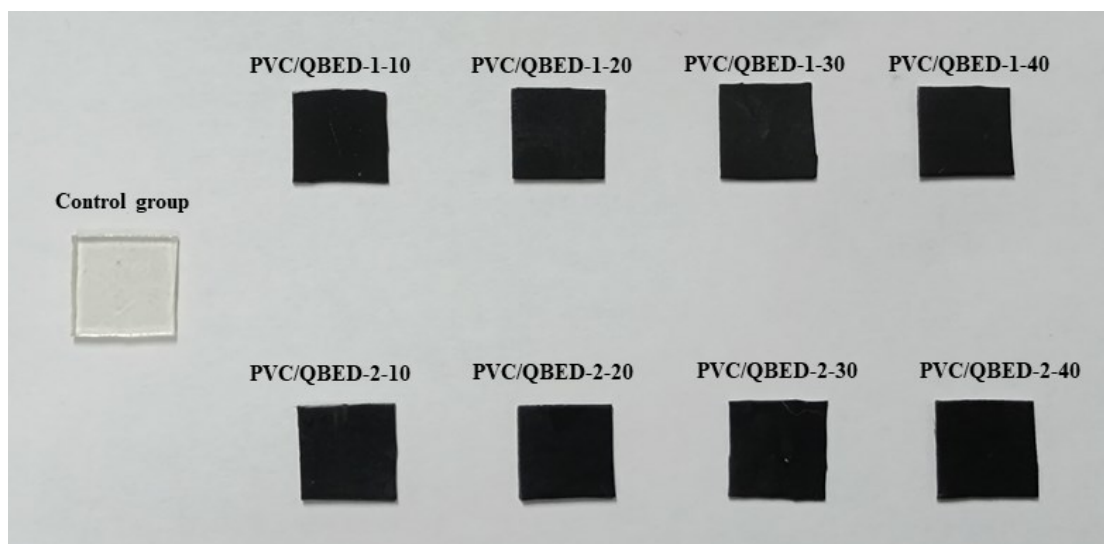

**Figure S4.** Images of PVC samples.

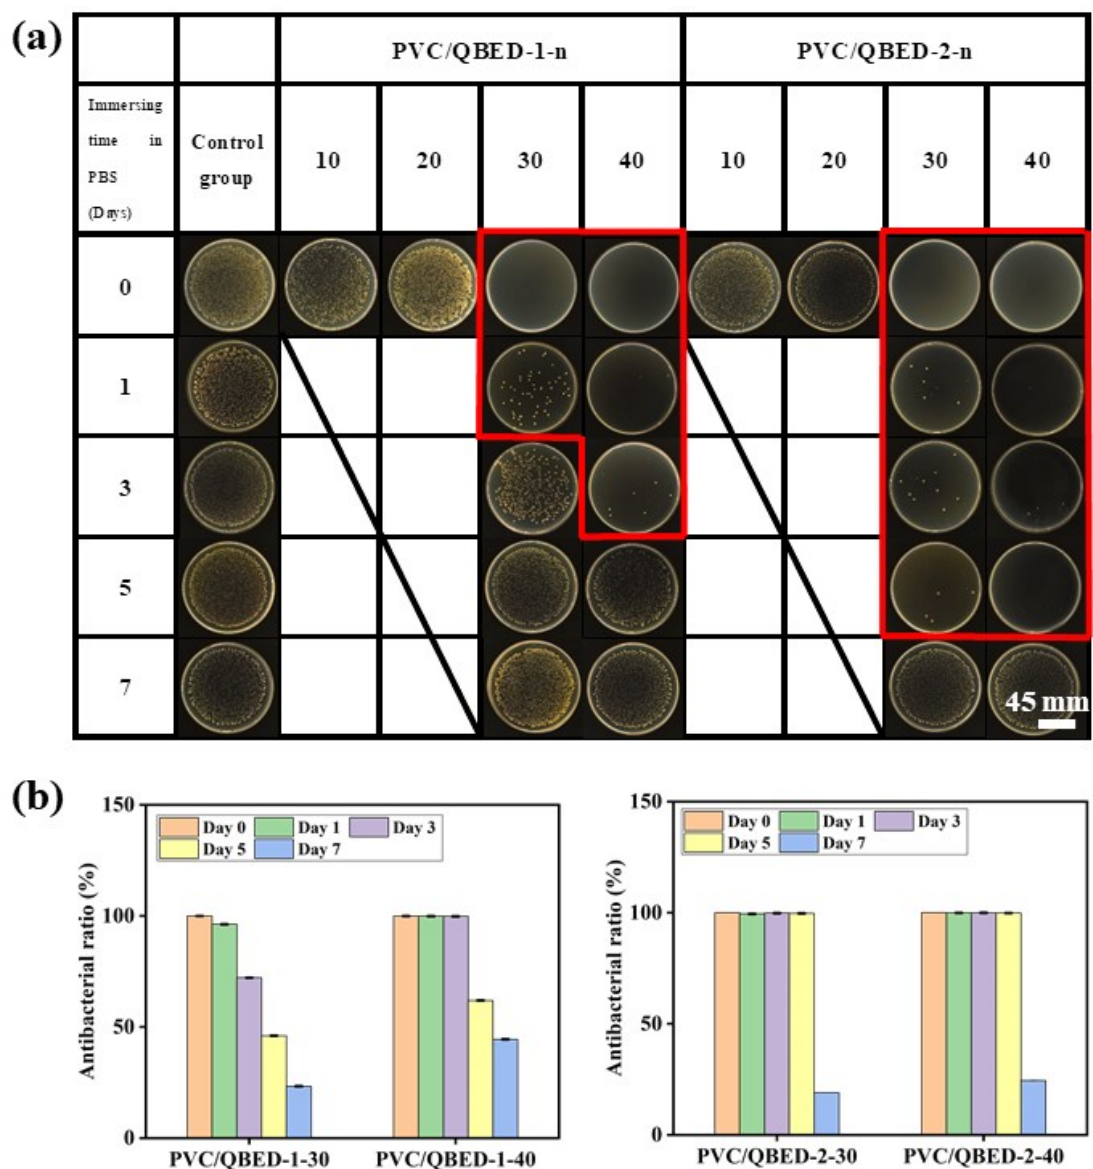

**Figure S5.** Antibacterial effect against *E.coli* of PVC samples after immersions in PBS for 0, 1, 3, 5, 7 days, respectively, *in vitro*, (a) figures of LB agar plates and (b) antibacterial ratio of PVC samples against *E.coli*.

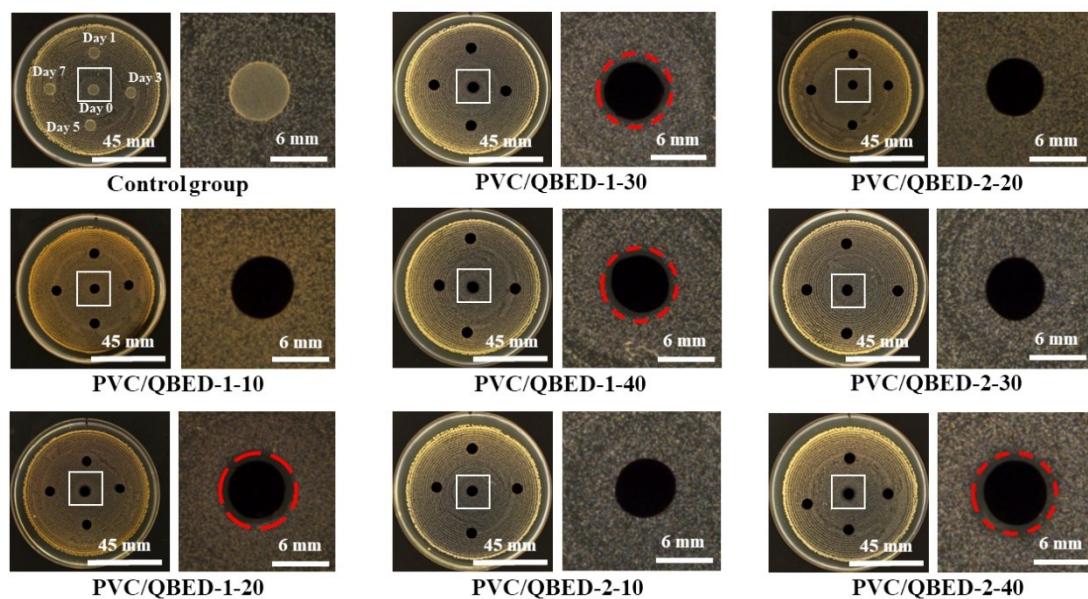

**Figure S6.** Photographs of the zones of inhibition of PVC samples against *S.aureus* after immersions in PBS for 0, 1, 3, 5, 7 days, respectively.

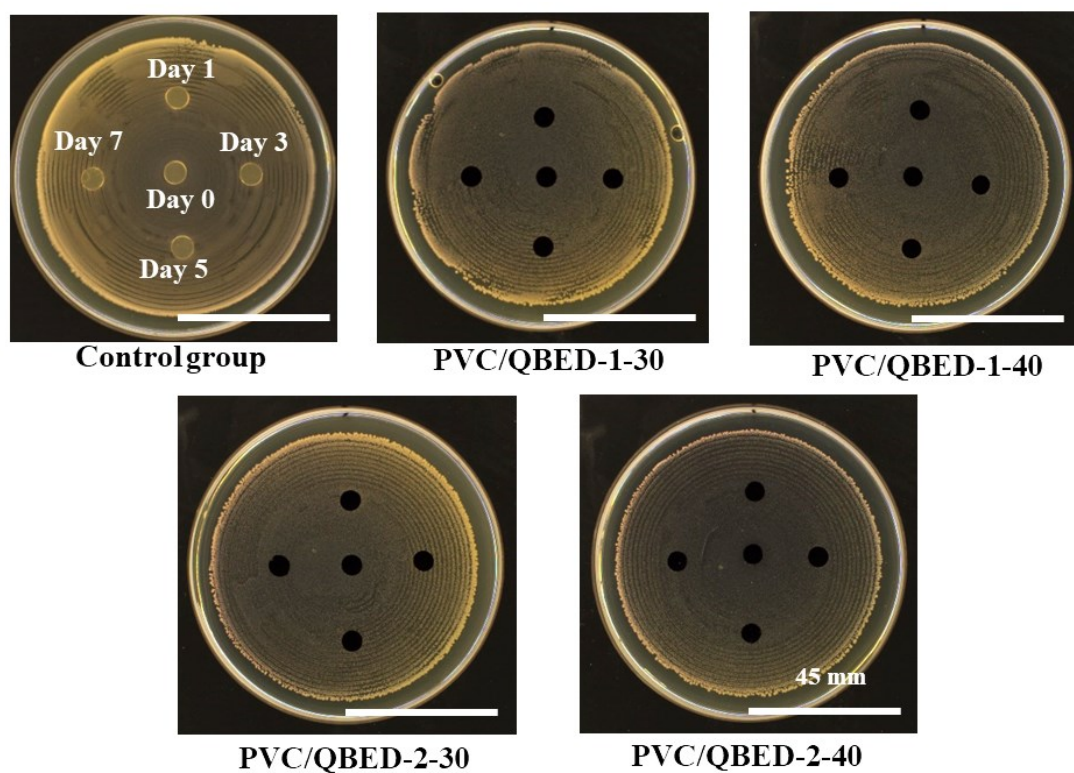

**Figure S7.** Photographs of the zones of inhibition of the control group, PVC/QBED-1-30, PVC/QBED-1-40, PVC/QBED-2-30 and PVC/QBED-1-40 against *E. coli* after immersions in PBS for 0, 1, 3, 5, 7 days, respectively.

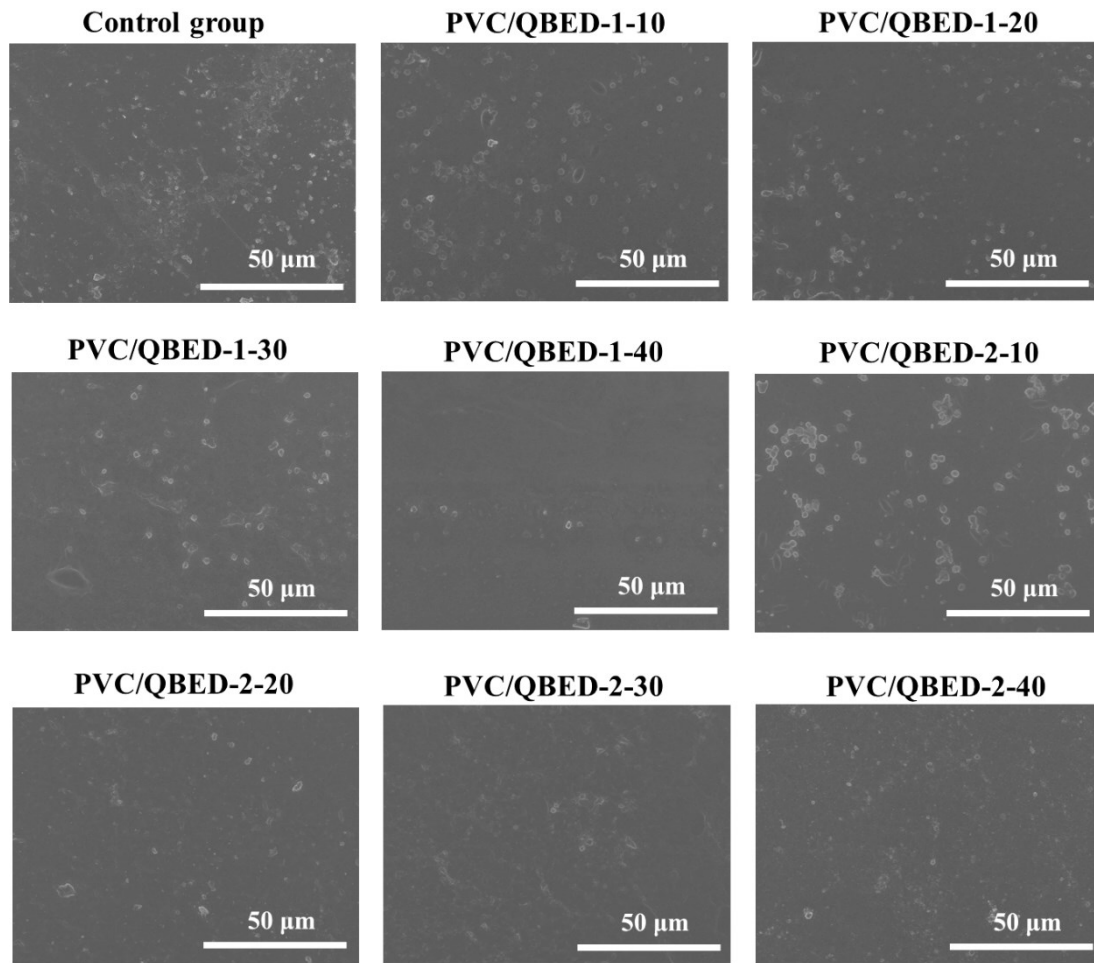

**Figure S8.** Morphology of adherent platelets on the surfaces of PVC samples observed by SEM.

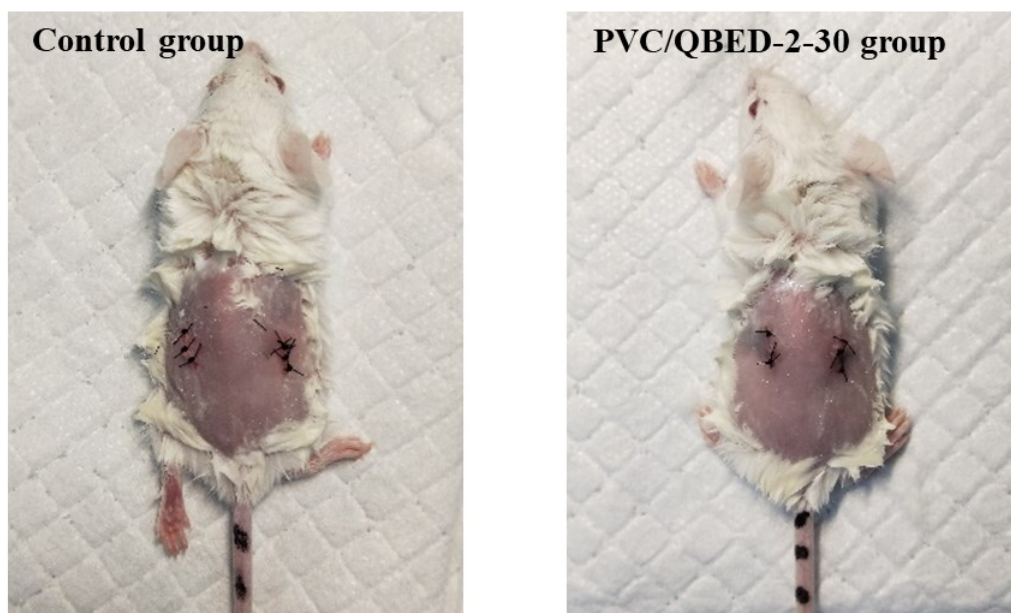

**Figure S9.** Overview of the animal model with PVC samples infection.
